# Supplementary material
Source: Springer Nature journal article supplement (https://www.springermedizin.de/resource/supplementary/12890_2012_416_MOESM7_ESM.pdf/9505182)

### (a) Rate Ratio of hospitalization

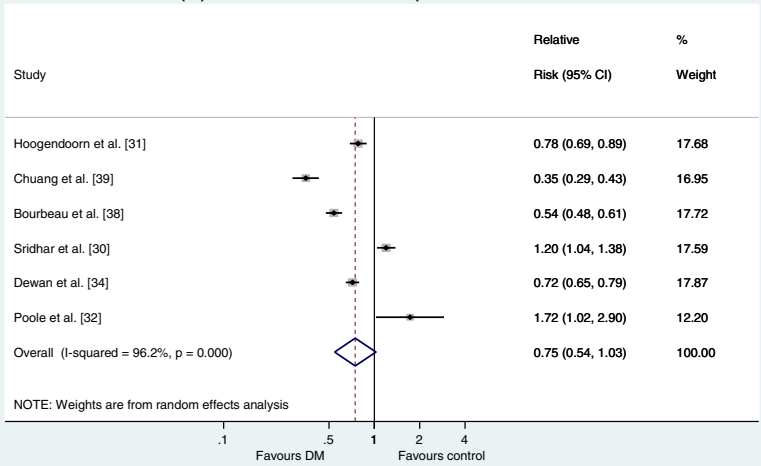

### (b) Difference in SGRQ

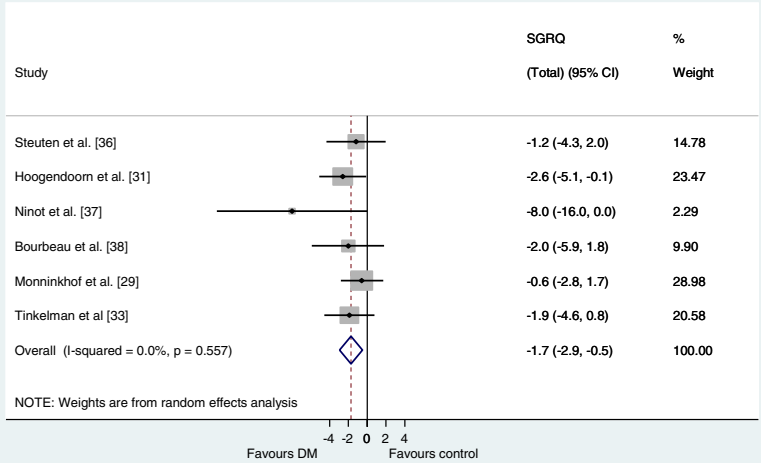

### (c) Relative Risk of mortality

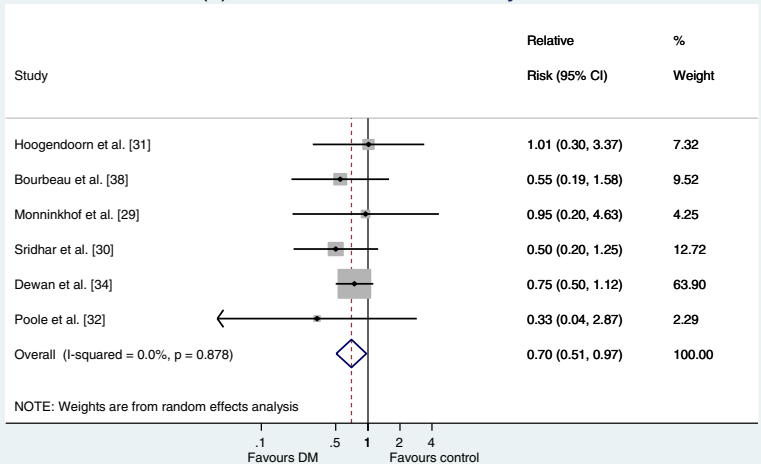

Supplement: MOESM7 [file 9505182]
